# Supplementary material for: lncRNA transcription induces meiotic recombination through chromatin remodelling in fission yeast
Source: PubMed Central journal article supplement (PMC7935937; doi:10.1038/s42003-021-01798-8), 2021-03-05
Supplement: 42003_2021_1798_MOESM1_ESM.pdf [file 42003_2021_1798_MOESM1_ESM.pdf]

## Supplementary information

### *lncRNA transcription induces meiotic recombination through chromatin remodelling in fission yeast*

Satoshi Senmatsu, Ryuta Asada, Arisa Oda, Charles S. Hoffman, Kunihiro Ohta, and Kouji Hirota

## Supplementary Figure legends

### Supplementary Fig. 1

#### **Role of *mlon-IE*-induced transcription in meiotic recombination.**

**a**, TSS of *ade6* transcripts induced from *mlon-IE* located in *M26:mlon-IE* cells during meiosis was determined by 5'-RACE. Black arrows indicate the TSS of *mlon-IE*-induced transcripts. The indicated number represents the position of the dominant TSS detected. The gray arrow indicates the TSS of the *ade6* transcript induced from the *M26* mutation. **b**, *ade6* transcript in *M26*, *M26::mlon-IE*, and *M26::mlon-IE-mut* cells during osmotic stress. Haploid cells were grown to a density of  $2.0 \times 10^7$  cells/mL in YEL medium and transferred to YEL medium containing 1.2 M sorbitol. The cells were harvested 60 min after osmotic stress. **c**, *ade6* transcript in *M375* and *M375::mlon-IE* cells during osmotic stress.

### Supplementary Fig. 2

#### ***mlon-IE*-induced transcription enhances meiotic recombination in *ade6-M26***

**a**, Schematic representation of meiotic recombination in *ade6* gene. For the reconstitution of a functional *ade6*<sup>+</sup> gene, *M26::mlon-IE* cells require a longer recombination tract than do *M26* cells. Moreover, insertion of *mlon-IE* makes the distances between *M26::mlon-IE/469* shorter than that between *M26/469*. **b**, Insertion of *mlon-IE* leads to the expression of a nonfunctional Ade6 protein. Adenine prototrophy was assessed by cell proliferation on SD plate medium lacking adenine.

### Supplementary Fig. 3

#### ***mlon-IE*-induced transcription induces DSB and chromatin remodeling in *ade6-M26***

**a**, Distribution of meiotic DSBs in *M26*, *M26::mlon-IE*, and *M26::mlon-IE-mut* cells. DSB band intensities around *M26* and *mlon-IE* 4 h after the onset of meiosis (dotted

line in Fig. 2b) were quantified using ImageJ (Plot Profile command). **b**, DSB intensities (dotted line in Fig. 2b) were quantified using ImageJ. DSB intensities normalized for parental band intensities relative to those of *M26* cells are presented. Error bars represent the standard deviation. n=3 biologically independent experiments. from three independent experiments. *P* values were calculated using unpaired one-sided Student's *t*-test: (\*\**P* < .01). **c**, **d**, Histogram shows the quantification of MNase-sensitive bands at *M26* (c) (black arrowhead in Fig. 2c.) and *mlon-IE* (d) (dotted line in Fig. 2c). Error bars show the standard deviation. n=3 biologically independent experiments.

#### **Supplementary Fig. 4**

##### **Genome-wide DSBs are not affected by the insertion of *mlon-IE* or *mlon-IE-mut* sequence**

The genome-wide DSBs in the samples used in Fig. 2 and Fig. 3 were analyzed by pulsed-field gel electrophoresis as described in Methods.

#### **Supplementary Fig. 5**

##### ***mlon-IE* plays a role downstream of transcription binding sequences created in *ade6-4002* and *ade6-4099* mutations**

**a**, Distribution of meiotic DSBs in *4002*, *4002::mlon-IE*, and *4002::mlon-IE-mut* cells. DSB band intensities around *4002* and *mlon-IE* 4 h after the onset of meiosis (dotted line in Fig. 3d) were quantified, as described in Supplementary Fig. 3a. **b**, DSB intensities (dotted line in Fig. 3d) normalized by parental band intensities relative to those of *4002* cells are presented. Error bars represent the standard deviation. n=3 biologically independent experiments. **c**, Meiotic DSB distribution in *4099*, *4099::mlon-IE*, and *4099::mlon-IE-mut* cells. DSB band intensities were quantified, as described in Supplementary Fig. 3a. **d**, DSB intensities (dotted line in Fig. 3e) were quantified, as described in Supplementary Fig. 3b. Error bars represent the standard

deviation. n=3 biologically independent experiments. *P* values were calculated using unpaired one-sided Student's *t*-test: (\*\**P* < .01).

### **Supplementary Fig. 6**

#### **Determination of a consensus sequence required for *mlon*RNA-c transcriptional initiation.**

Northern blot analysis to examine *fbp1* transcripts in indicated cells carrying replacement sequences in *mlon-IE*. Cells were grown to a density of  $2.0 \times 10^7$  cells/mL in YER medium and then transferred to YED medium. The cells were harvested at the indicated times. The *cam1* transcript was used as an internal control.

### **Supplementary Fig. 7**

#### **Chromatin remodeling mediated by *mlon*-box-dependent intergenic transcription in the *SPBC24C6.09c* upstream region**

**a**, DSB intensities (dotted line in Fig. 5c) were quantified as described in Supplementary Fig. 3b. Distribution of meiotic DSBs in wild-type and *mlon*-box-replacement cells. DSB band intensity in the intergenic region between *SPBC24C6.09c* and *SPNCRNA.1506* at 4 h after the onset of meiosis (in Fig. 5c) was analyzed as described in Supplementary Fig. 3a. The arrow indicates DSB around *mlon*-box. **b**, Northern blot analysis in wild-type and *mlon*-box-replacement cells to examine *SPNCRNA.1506* transcription during *pat1-114*-induced meiosis. The right probe shown in Fig. 5b was used. 18S rRNA stained by ethidium bromide is shown as a loading control. **c**, Meiotic chromatin remodeling in indicated cells during *pat1-114*-induced meiosis. The black arrowhead and arrows indicate MNase-sensitive sites appearing meiotically around *mlon*-box.

### **Supplementary Fig. 8**

***mlon*-box in the *SPBC24C6.09c* upstream region regulates *SPBC24C6.09c***

### **transcription in collaboration with Atf1**

**a**, Schematic representation of *mlon-box* in the *SPBC24C6.09c* upstream region. The 10-nucleotide *mlon-box* sequence is shown in bold and italic, and the Atf1-binding-like motif is shaded. **b**, ChIP analysis to examine Atf1 binding at *mlon-box* in *SPBC24C6.09c* in indicated cells during *pat1-114*-induced meiosis. Error bars show the standard deviation. n=3 biologically independent experiments. *P* values were calculated using unpaired one-sided Student's *t*-test: (\*\**P* < .01). **c**, Northern blot analysis to examine the *SPBC24C6.09c* transcript in indicated cells during *pat1-114*-induced meiosis. The *cam1* transcript is shown as a loading control.

### **Supplementary Fig. 9**

#### ***mlon-box* is enriched in the upstream region of the TSS**

Relationship between transcription start site (TSS) and *mlon-box*. The *X* axis indicates the distance from *mlon-box*, and the *Y* axis indicates the TSS frequency.

### **Supplementary Fig. 10**

#### **Uncropped images used in all figures in this study**

Senmatsu et al. Supplementary Fig. 1

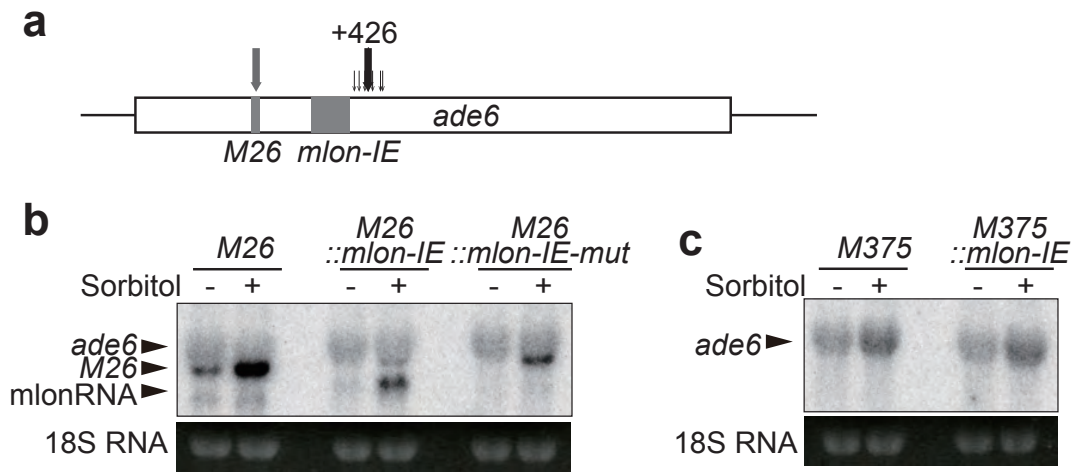

Senmatsu et al. Supplementary Fig. 2

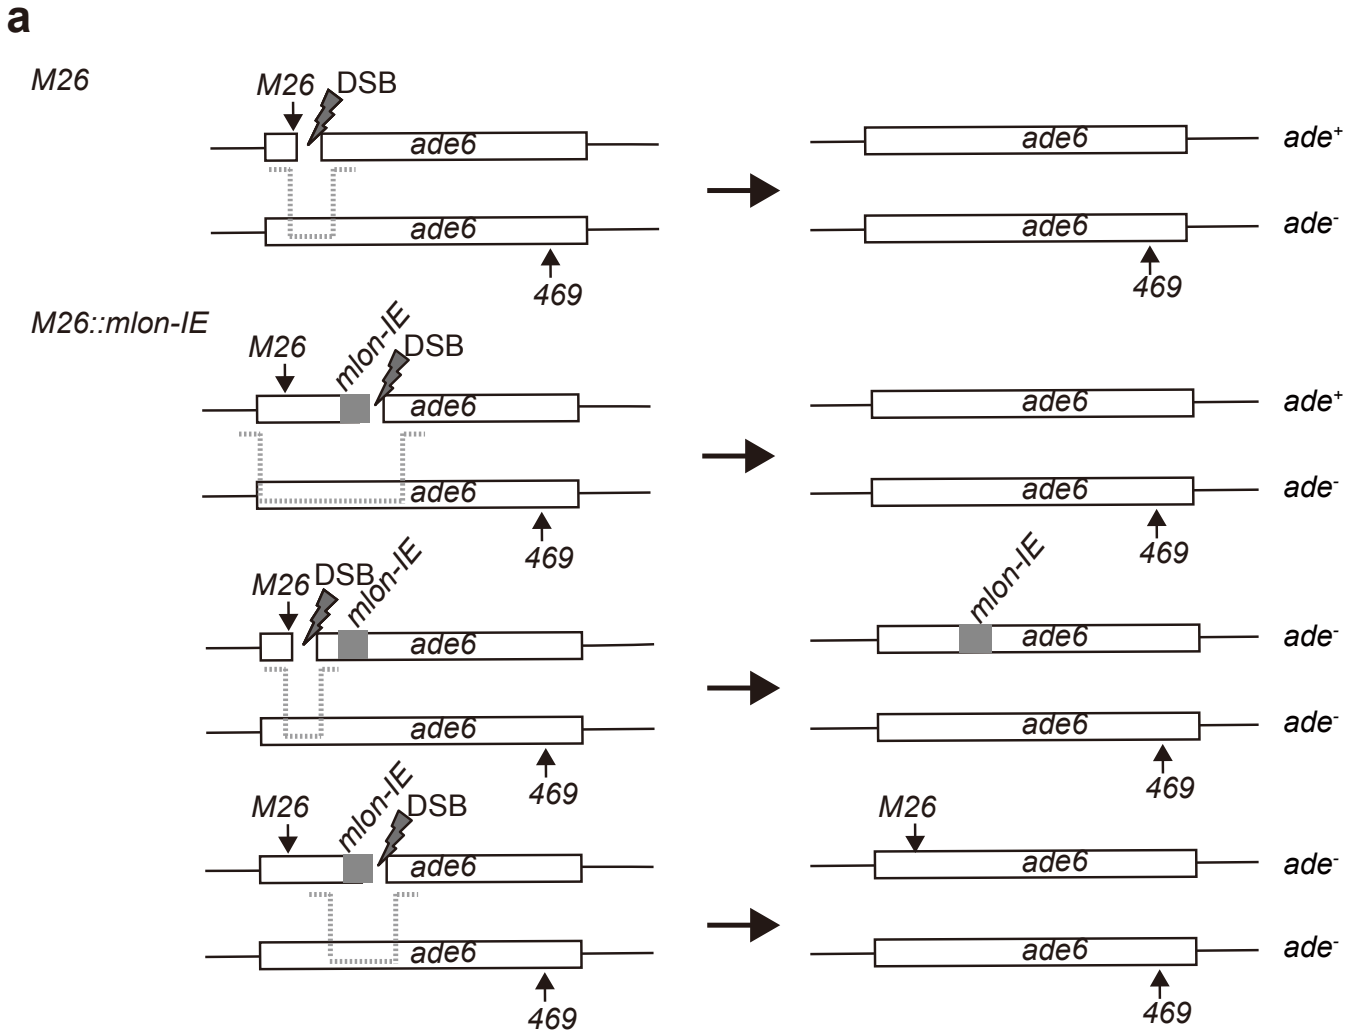

**b**

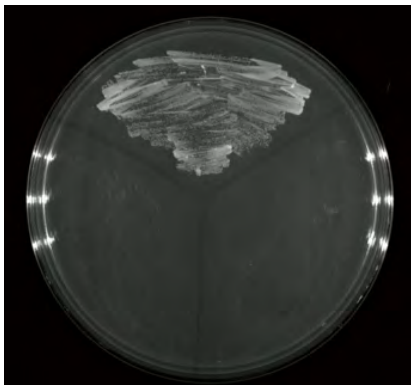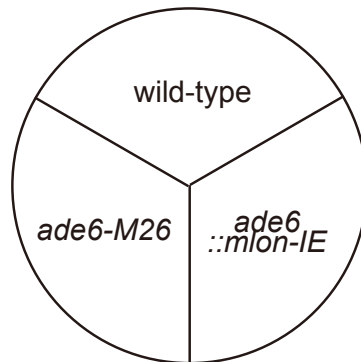

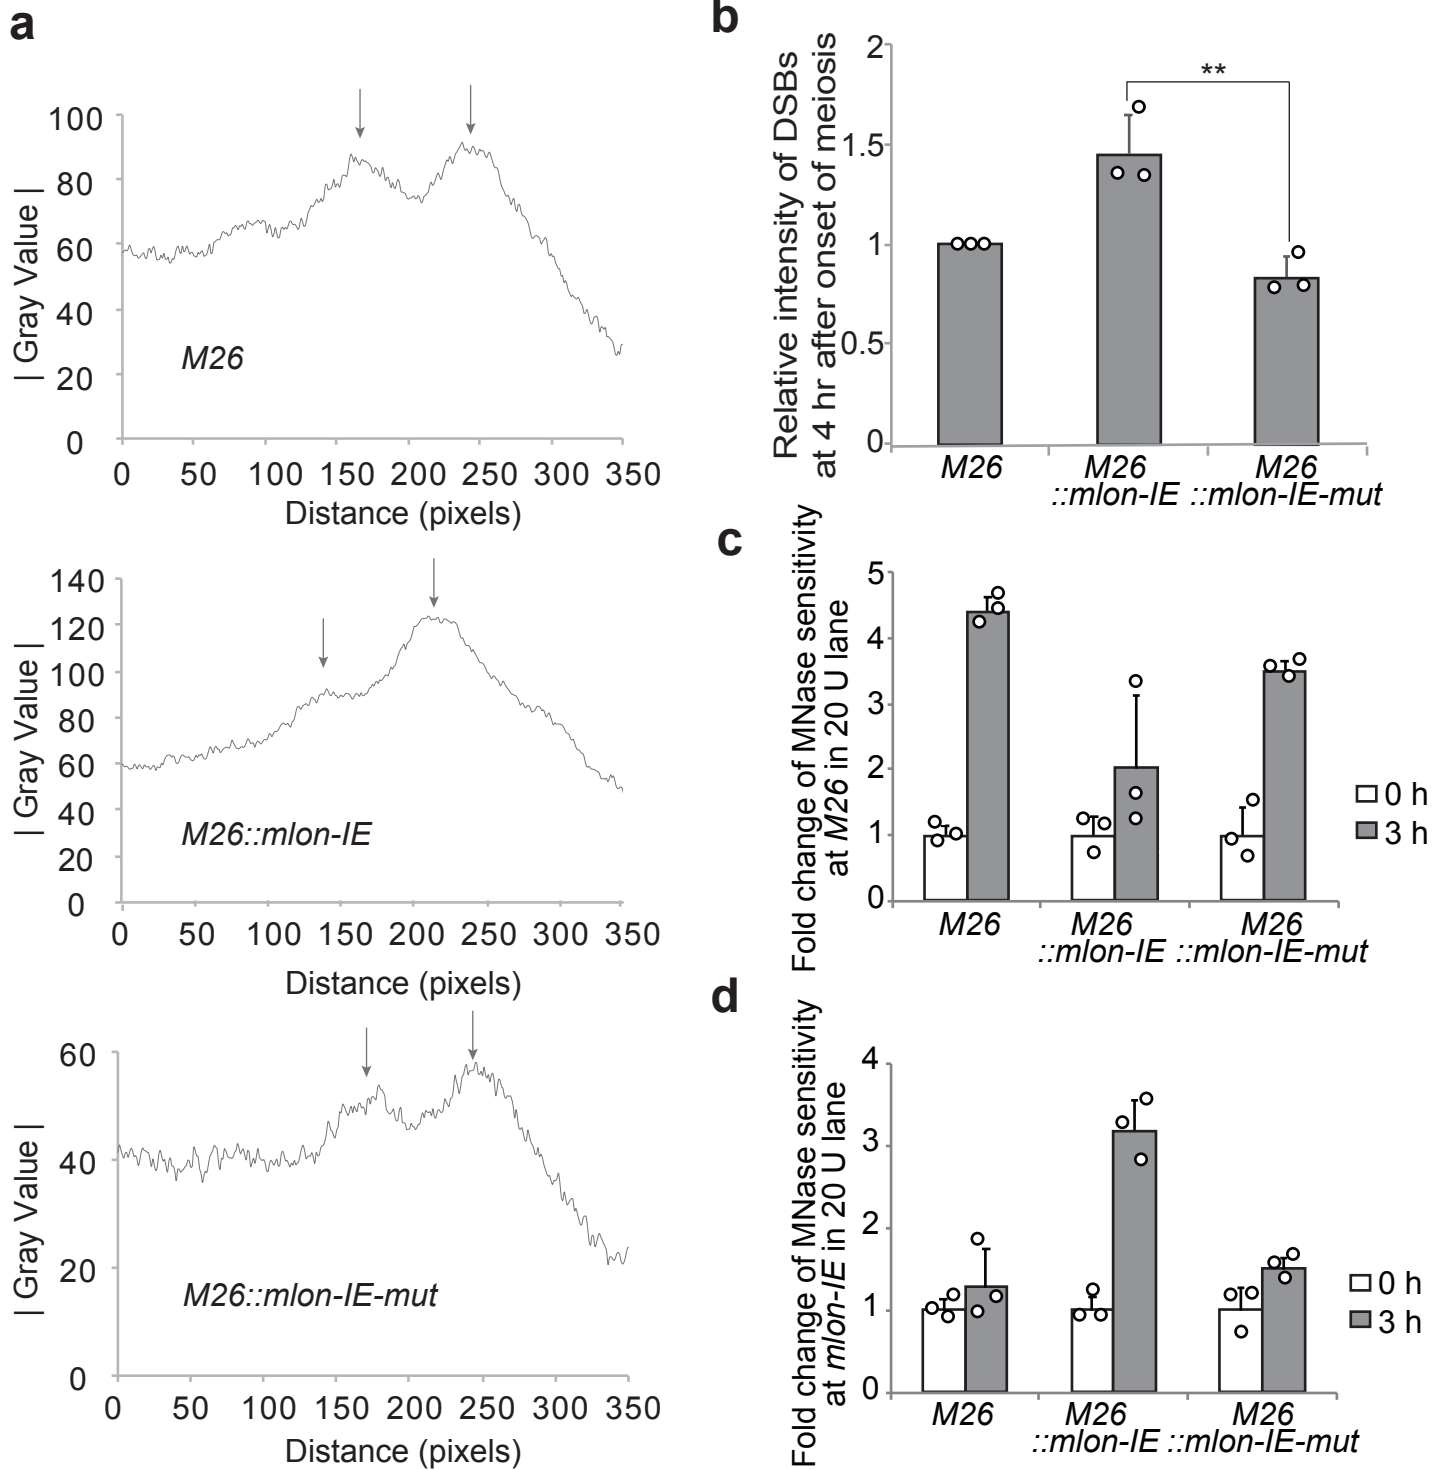



Senmatsu et al. Supplementary Fig. 4

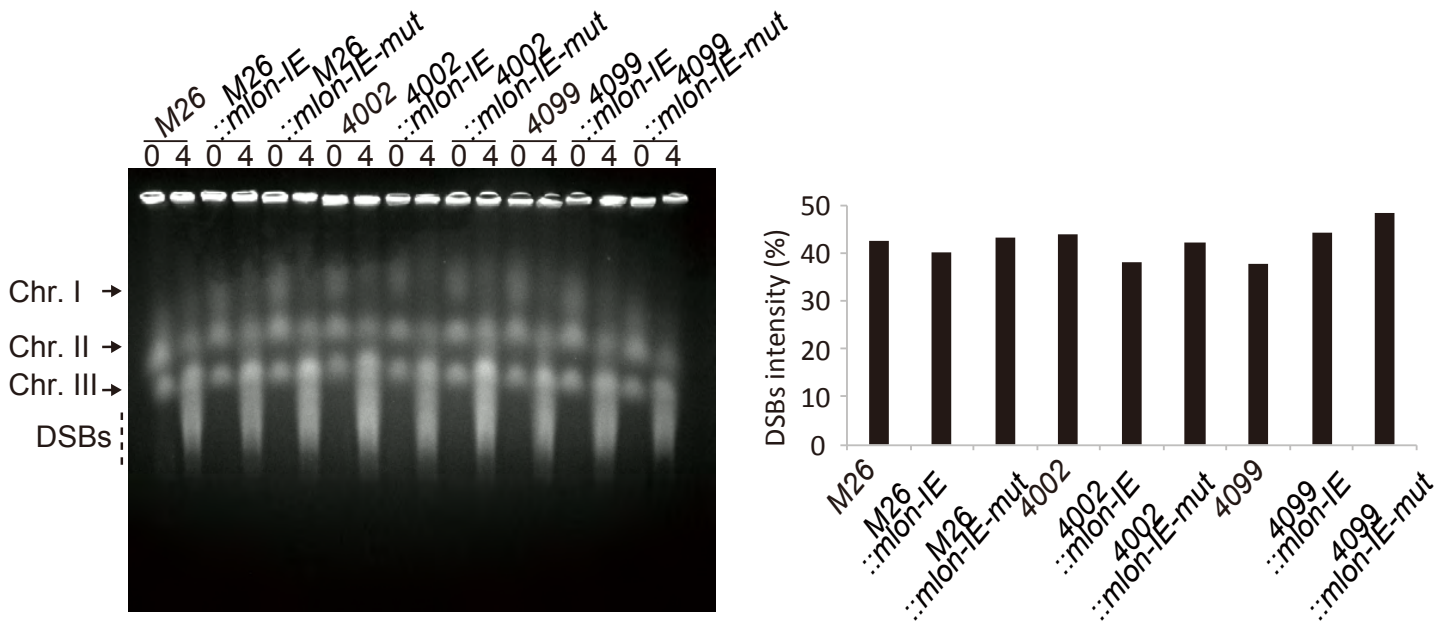

Senmatsu et al. Supplementary Fig. 5

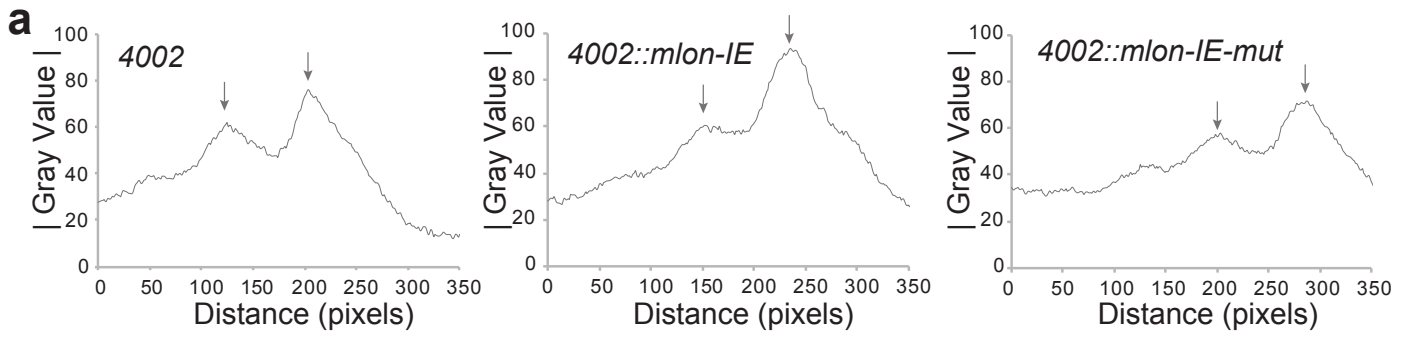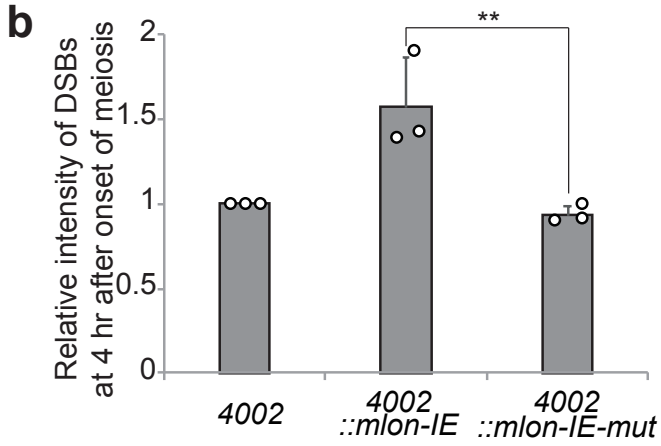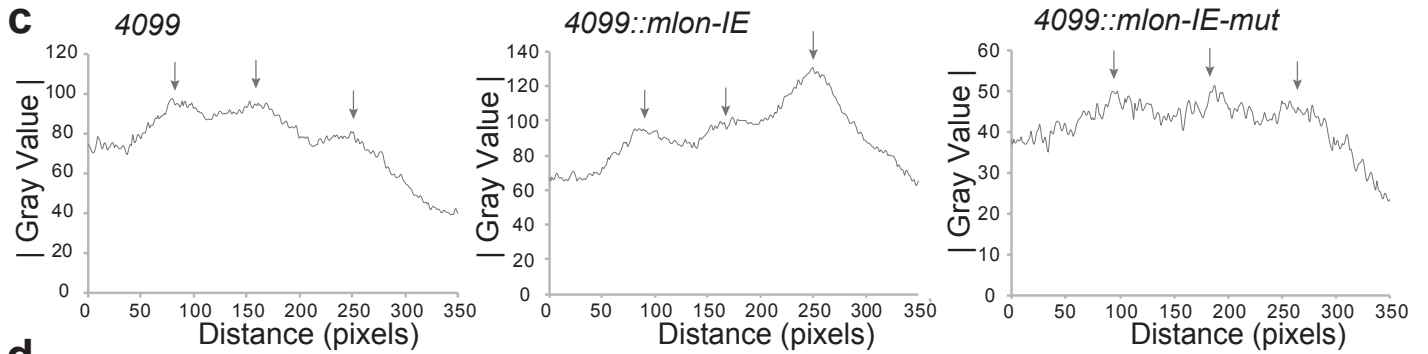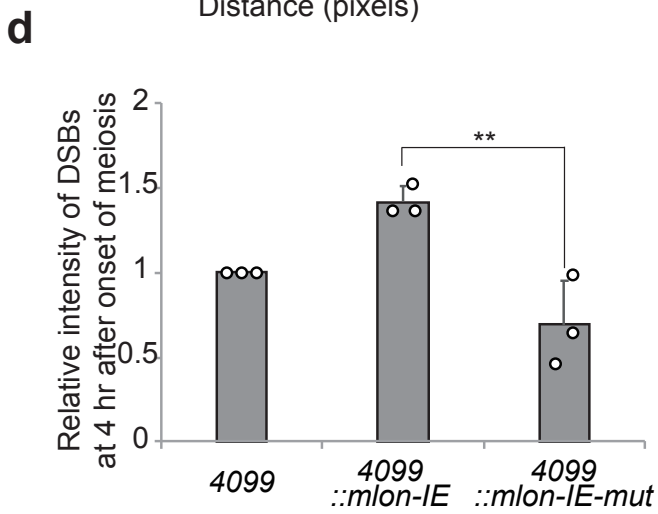

# Senmatsu et al. Supplementary Fig. 6

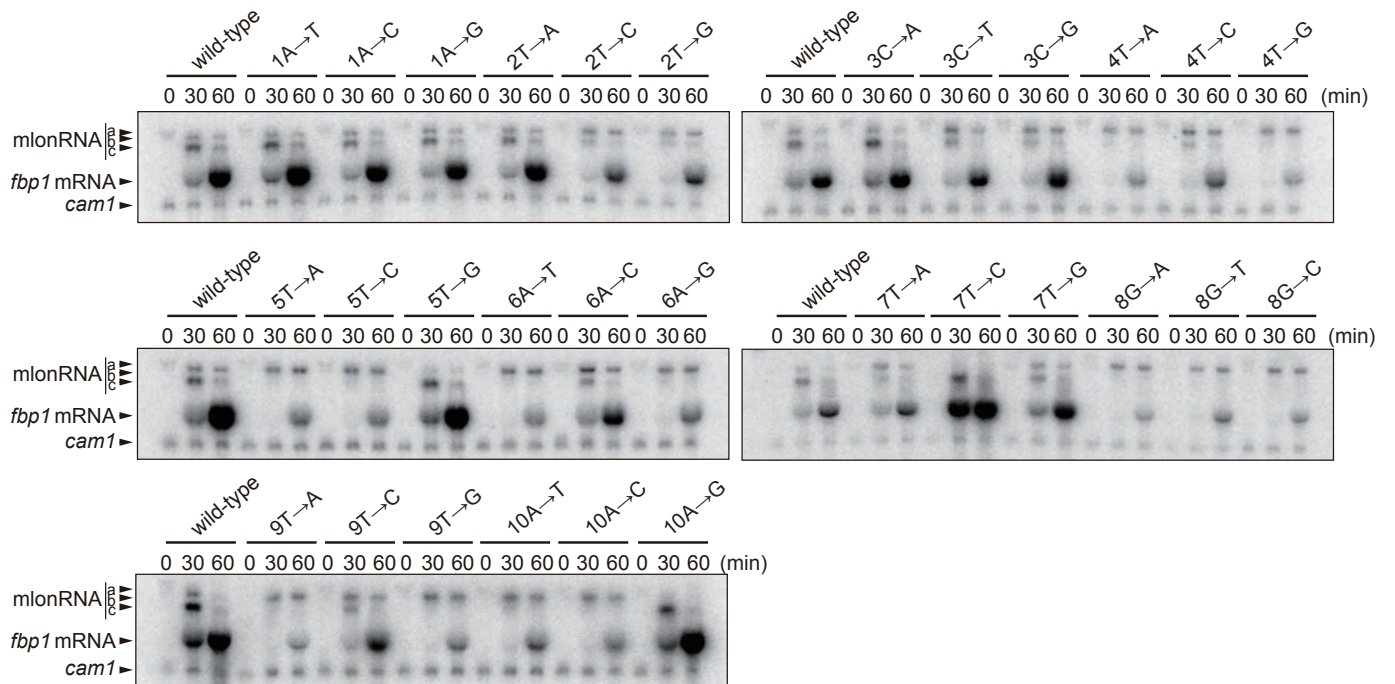

Senmatsu et al. Supplementary Fig. 7

**a**

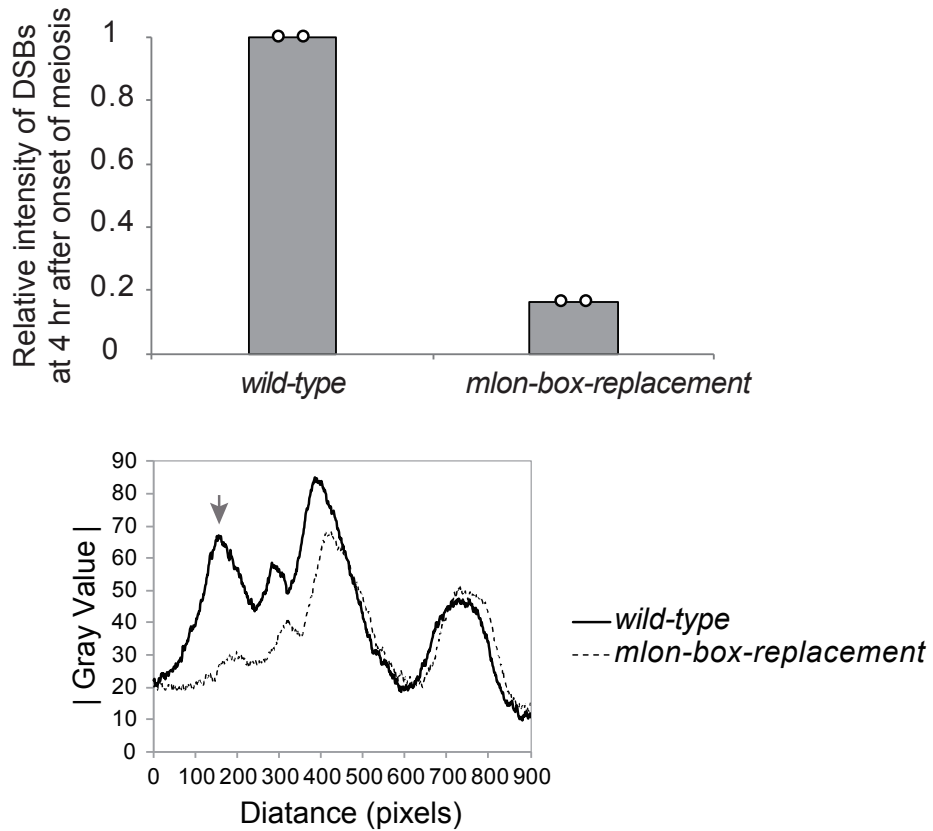

**b**

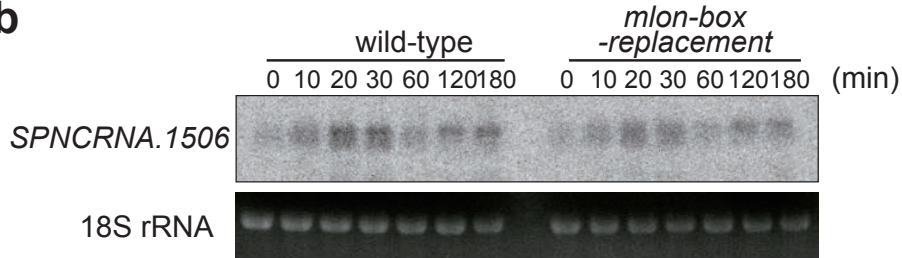

**c**

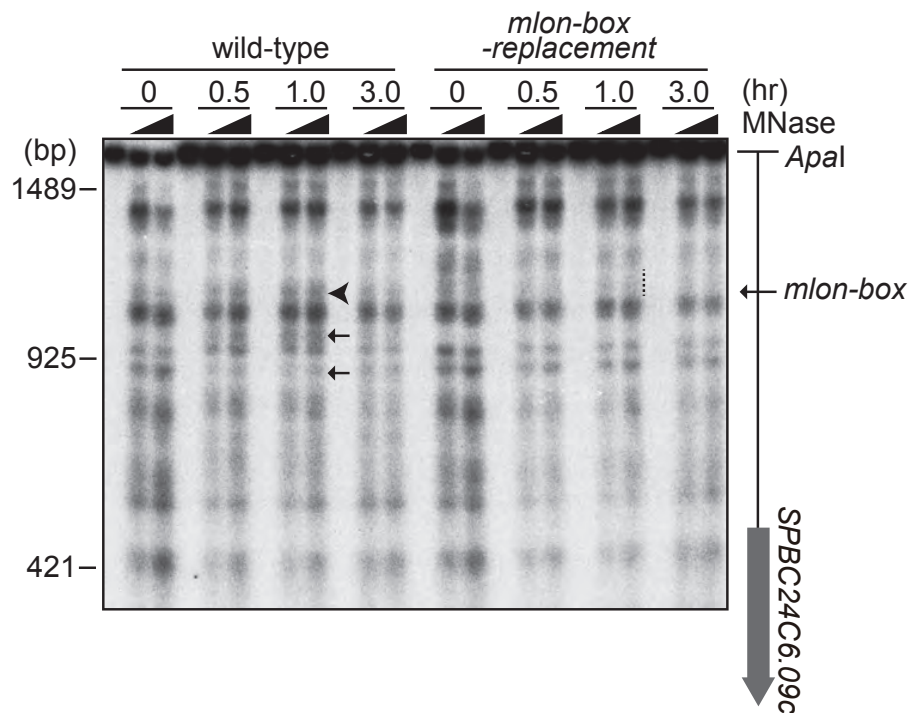



Senmatsu et al. Supplementary Fig. 9

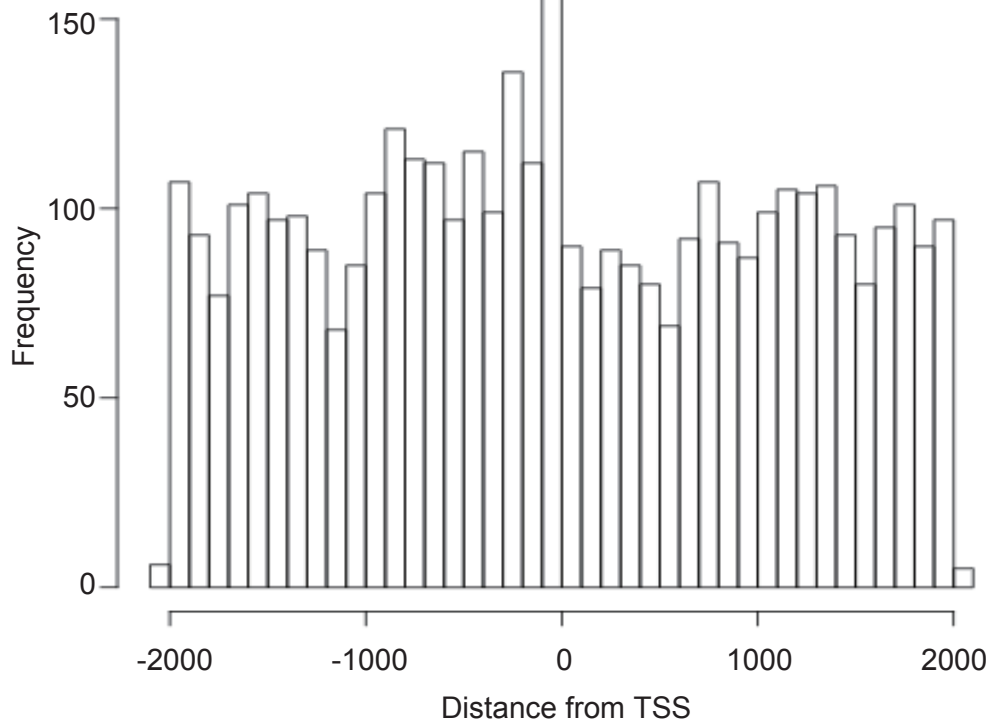

Senmatsu et al. Supplementary Fig. 10\_1

Uncropped blot used in Fig. 1b

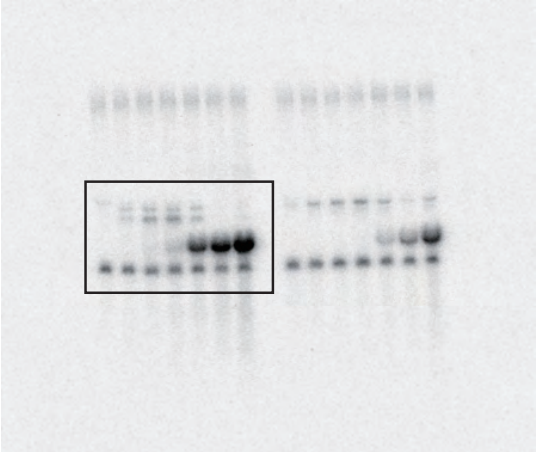

Uncropped blot used in Fig. 1b

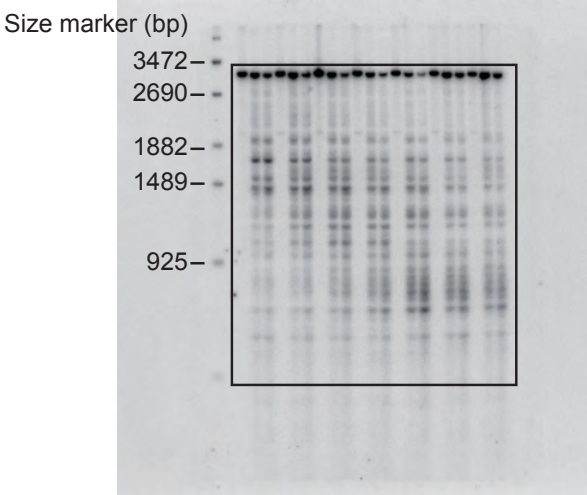

Uncropped blot used in Fig. 1d

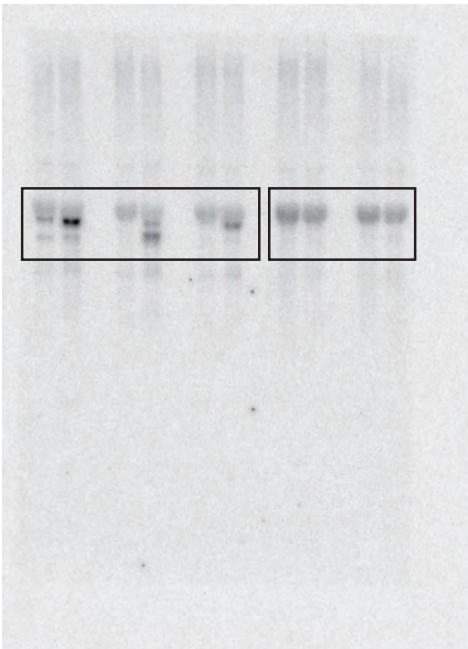

Uncropped gel used in Fig. 1d

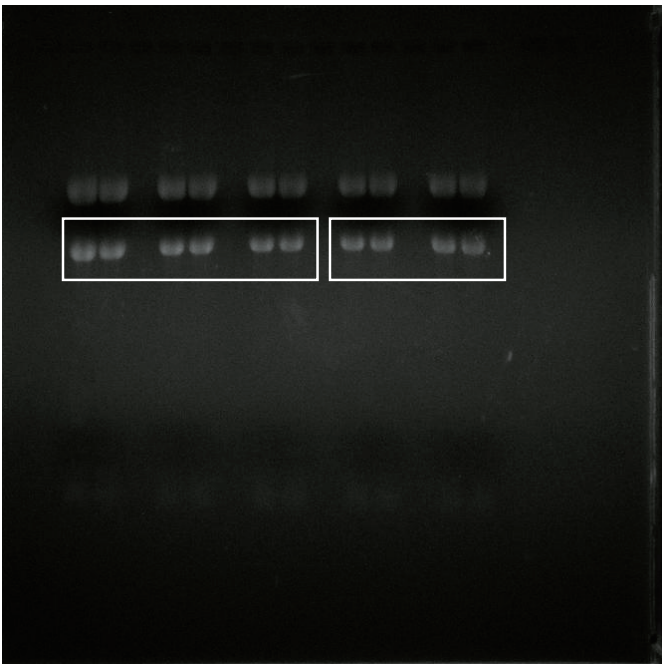

# Senmatsu et al. Supplementary Fig. 10\_2

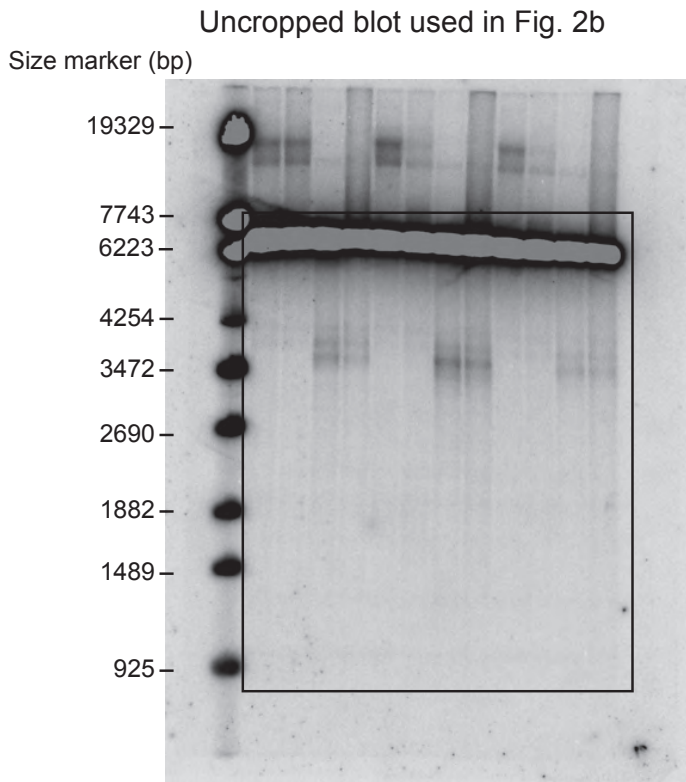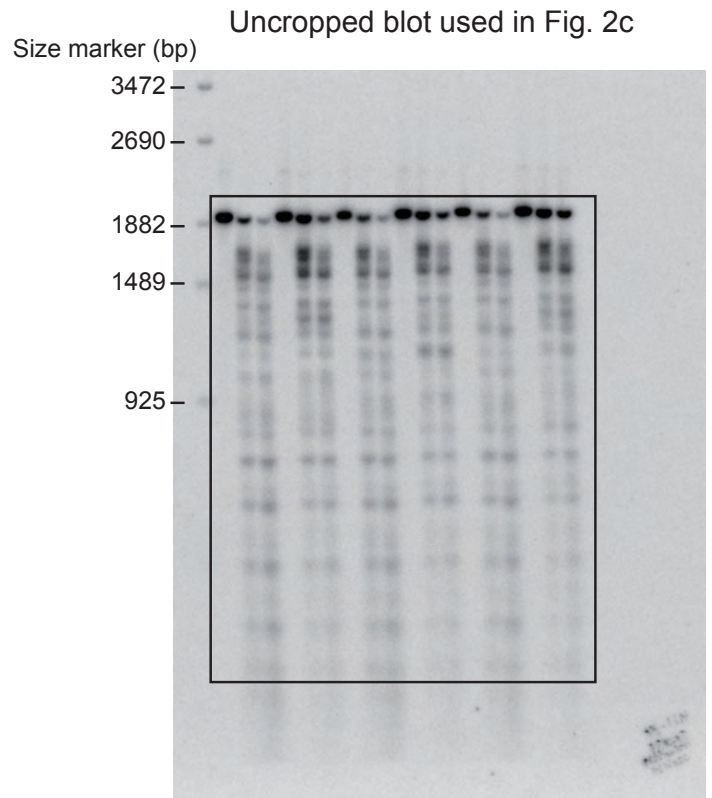



Senmatsu et al. Supplementary Fig. 10\_3

Uncropped blot used in Fig. 3b

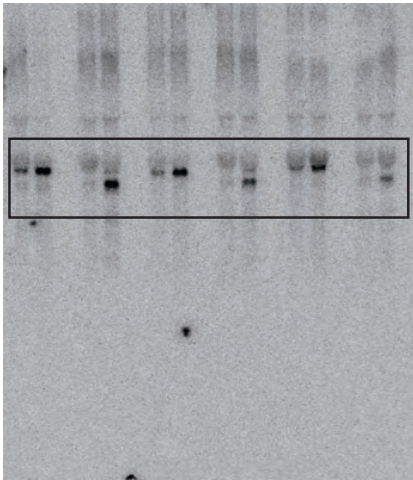

Uncropped gel used in Fig. 3b

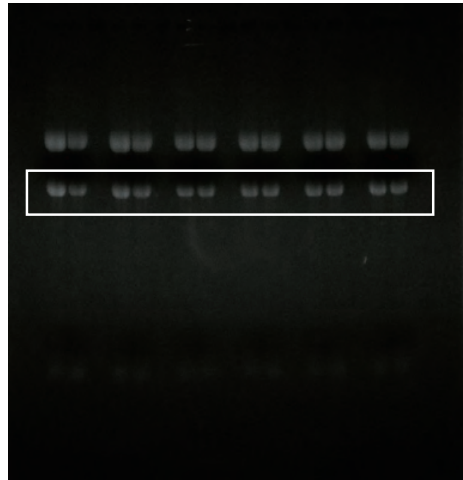

Uncropped blot used in Fig. 3b

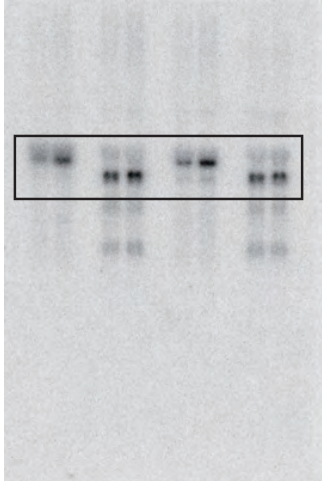

Uncropped gel used in Fig. 3b

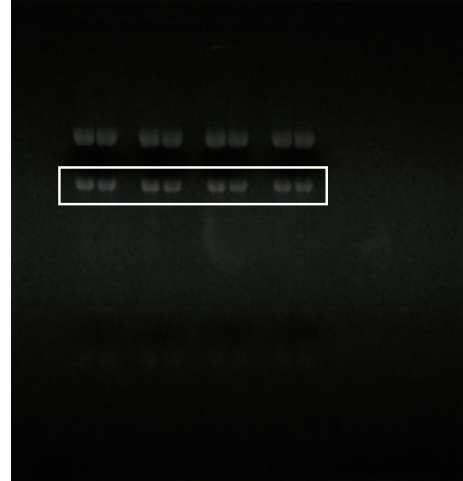

Size marker (bp) Uncropped blot used in Fig. 3d

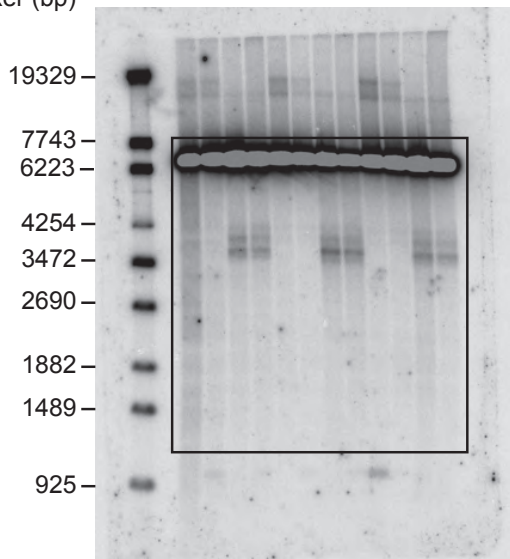

Size marker (bp) Uncropped blot used in Fig. 3e

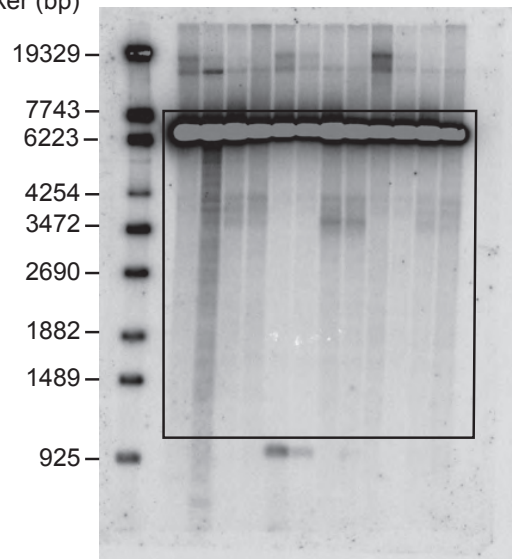

Senmatsu et al. Supplementary Fig. 10\_4

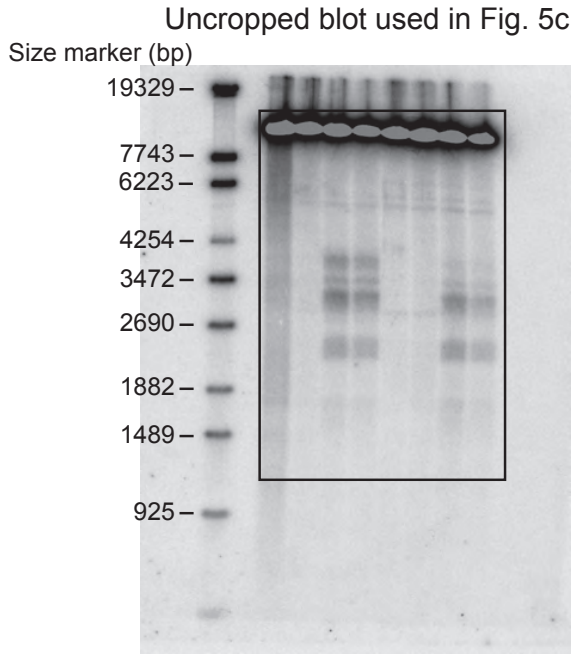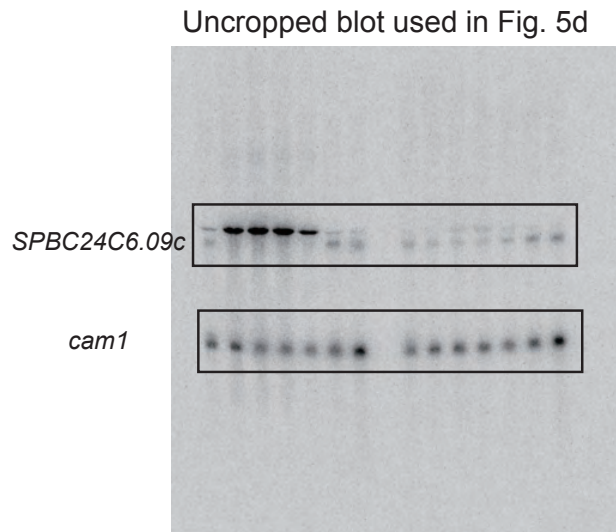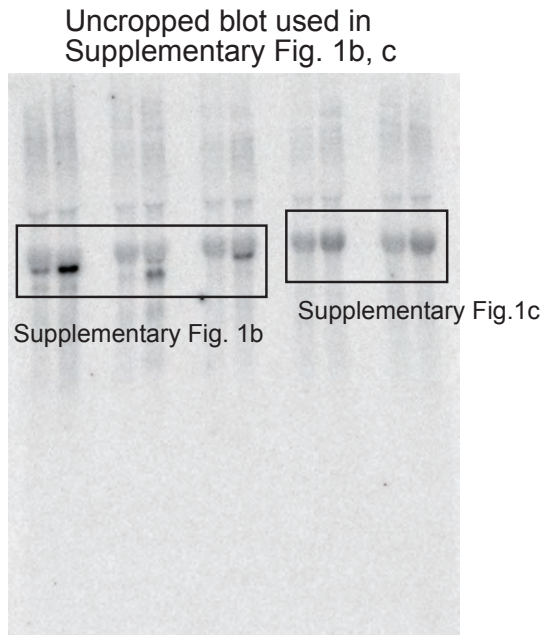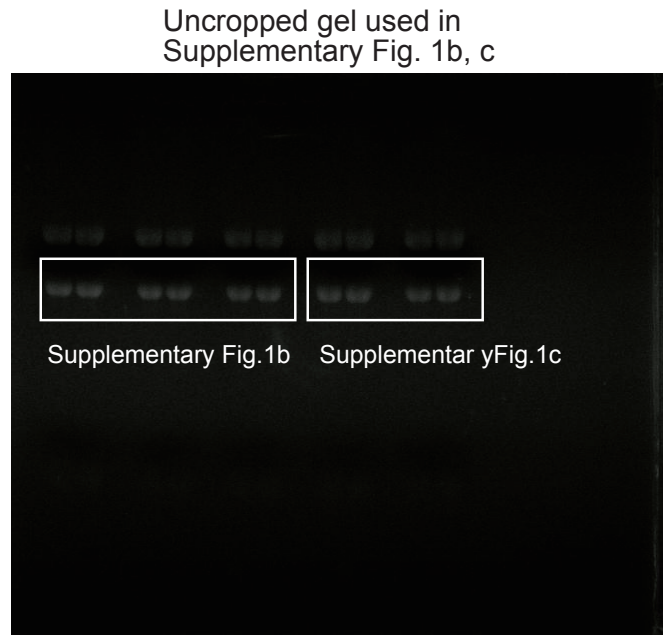

Uncropped blot used in Supplementary Fig. 6

wild-type, replacement 1A and 2T

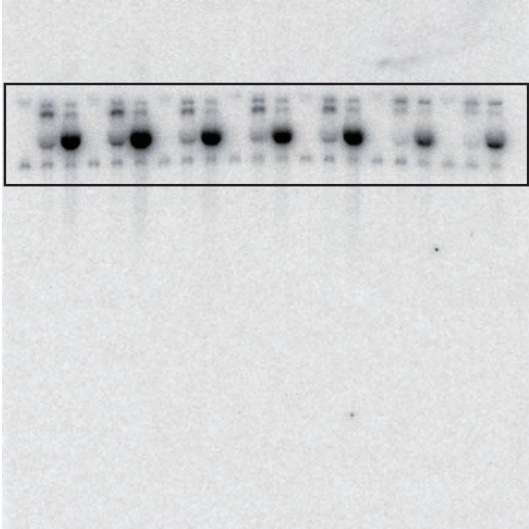

wild-type, replacement 3C and 4T

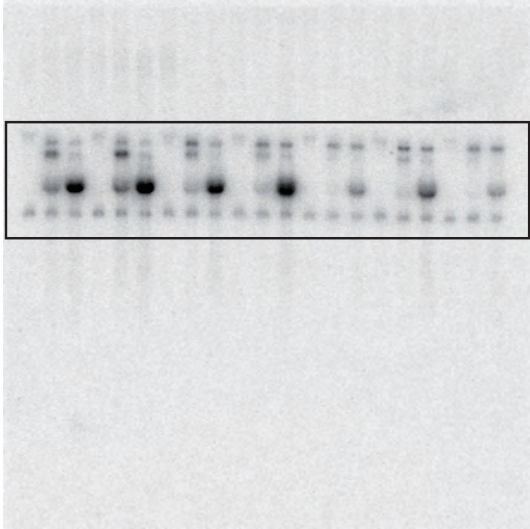

wild-type, replacement 5T and 6A

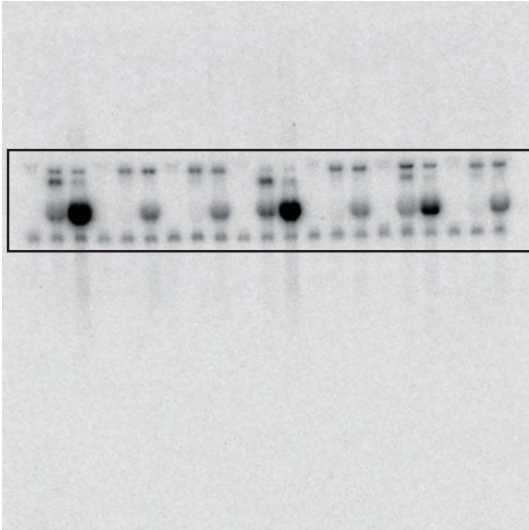

wild-type, replacement 7T and 8G

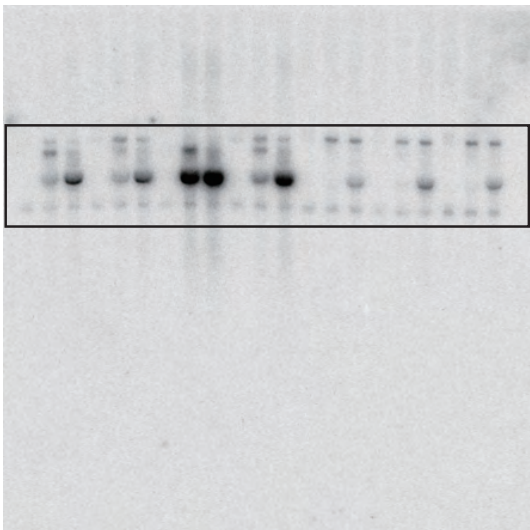

wild-type, replacement 9T and 10A

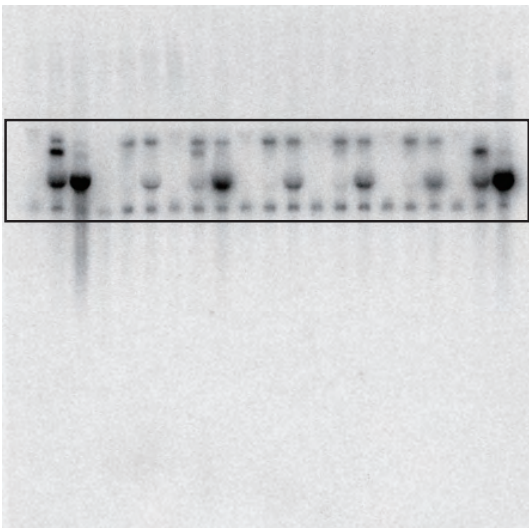

# Senmatsu et al. Supplementary Fig. 10\_6

Uncropped blot used in Supplementary Fig. 7b

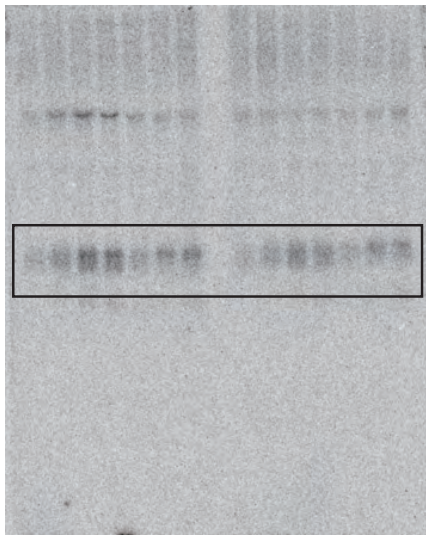

Uncropped gel used in Supplementary Fig. 7b

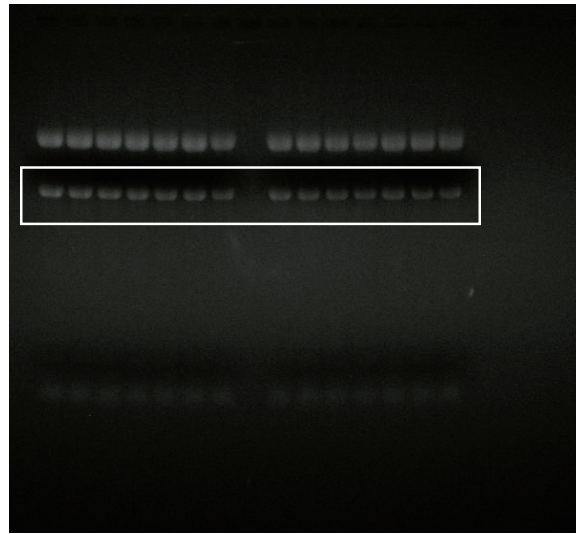

Uncropped blot used in Supplementary Fig. 7c

Size marker (bp)

2690 –  
1882 –  
1489 –  
925 –  
421 –

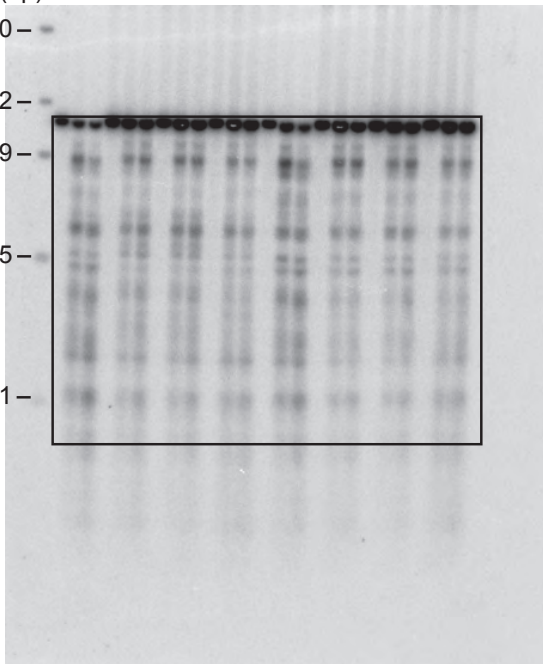

Uncropped blot used in Supplementary Fig. 8c

*SPBC24C6.09c*

*cam1*

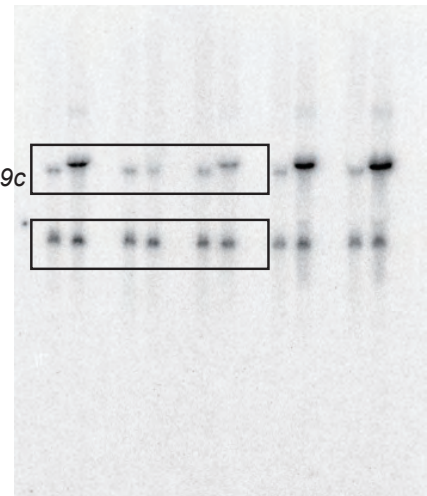

## Supplementary Table 1

| Strain | Genotype                                                                  |
|--------|---------------------------------------------------------------------------|
| SPH2   | <i>h<sup>+</sup> ura4-D18</i>                                             |
| SPH142 | <i>h<sup>+</sup> ade6-M26 ura4-D18</i>                                    |
| SPH143 | <i>h<sup>-</sup> ade6-469 leu1-32</i>                                     |
| SPH313 | <i>h<sup>+</sup> ura4-D18 mlonc promoter (ATCTTATGTA) :: (ATCTTATATA)</i> |
| SPH314 | <i>h<sup>+</sup> ura4-D18 mlonc promoter (ATCTTATGTA) :: (ATCTTGTGTA)</i> |
| SPH521 | <i>h<sup>+</sup> ura4-D18 mlonc promoter (ATCTTATGTA) :: (TTCTTATGTA)</i> |
| SPH522 | <i>h<sup>+</sup> ura4-D18 mlonc promoter (ATCTTATGTA) :: (CTCTTATGTA)</i> |
| SPH523 | <i>h<sup>+</sup> ura4-D18 mlonc promoter (ATCTTATGTA) :: (GTCTTATGTA)</i> |
| SPH524 | <i>h<sup>+</sup> ura4-D18 mlonc promoter (ATCTTATGTA) :: (AACTTATGTA)</i> |
| SPH525 | <i>h<sup>+</sup> ura4-D18 mlonc promoter (ATCTTATGTA) :: (ACCTTATGTA)</i> |
| SPH526 | <i>h<sup>+</sup> ura4-D18 mlonc promoter (ATCTTATGTA) :: (AGCTTATGTA)</i> |
| SPH527 | <i>h<sup>+</sup> ura4-D18 mlonc promoter (ATCTTATGTA) :: (ATATTATGTA)</i> |
| SPH528 | <i>h<sup>+</sup> ura4-D18 mlonc promoter (ATCTTATGTA) :: (ATTTTATGTA)</i> |
| SPH529 | <i>h<sup>+</sup> ura4-D18 mlonc promoter (ATCTTATGTA) :: (ATGTTATGTA)</i> |
| SPH530 | <i>h<sup>+</sup> ura4-D18 mlonc promoter (ATCTTATGTA) :: (ATCATATGTA)</i> |
| SPH531 | <i>h<sup>+</sup> ura4-D18 mlonc promoter (ATCTTATGTA) :: (ATCCTATGTA)</i> |
| SPH532 | <i>h<sup>+</sup> ura4-D18 mlonc promoter (ATCTTATGTA) :: (ATCGTATGTA)</i> |
| SPH533 | <i>h<sup>+</sup> ura4-D18 mlonc promoter (ATCTTATGTA) :: (ATCTAATGTA)</i> |
| SPH534 | <i>h<sup>+</sup> ura4-D18 mlonc promoter (ATCTTATGTA) :: (ATCTCATGTA)</i> |
| SPH535 | <i>h<sup>+</sup> ura4-D18 mlonc promoter (ATCTTATGTA) :: (ATCTGATGTA)</i> |
| SPH536 | <i>h<sup>+</sup> ura4-D18 mlonc promoter (ATCTTATGTA) :: (ATCTTTTGTA)</i> |

SPH537 *h<sup>+</sup> ura4-D18 mlonc promoter (ATCTTATGTA) :: (ATCTTGTGTA)*

SPH538 *h<sup>+</sup> ura4-D18 mlonc promoter (ATCTTATGTA) :: (ATCTTAAGTA)*

SPH539 *h<sup>+</sup> ura4-D18 mlonc promoter (ATCTTATGTA) :: (ATCTTACGTA)*

SPH540 *h<sup>+</sup> ura4-D18 mlonc promoter (ATCTTATGTA) :: (ATCTTAGGTA)*

SPH541 *h<sup>+</sup> ura4-D18 mlonc promoter (ATCTTATGTA) :: (ATCTTATTTA)*

SPH542 *h<sup>+</sup> ura4-D18 mlonc promoter (ATCTTATGTA) :: (ATCTTATCTA)*

SPH543 *h<sup>+</sup> ura4-D18 mlonc promoter (ATCTTATGTA) :: (ATCTTATGAA)*

SPH544 *h<sup>+</sup> ura4-D18 mlonc promoter (ATCTTATGTA) :: (ATCTTATGCA)*

SPH545 *h<sup>+</sup> ura4-D18 mlonc promoter (ATCTTATGTA) :: (ATCTTATGGA)*

SPH546 *h<sup>+</sup> ura4-D18 mlonc promoter (ATCTTATGTA) :: (ATCTTATGGT)*

SPH547 *h<sup>+</sup> ura4-D18 mlonc promoter (ATCTTATGTA) :: (ATCTTATGGC)*

SPH548 *h<sup>+</sup> ura4-D18 mlonc promoter (ATCTTATGTA) :: (ATCTTATGGG)*

SPH551 *h<sup>+</sup> ura4-D18 ade6-M26(+313 to +377)::fbp1(-870 to 806)*

SPH556 *h<sup>+</sup> ura4-D18 ade6-M26(+313 to +377)::fbp1(-870 to 806, (-851 to -842)::act1(+456 to +465))*

SPH574 *h<sup>+</sup> ura4-D18 ade6-M26(+313 to +377)::fbp1(-870 to 806) his3-D1*

SPH583 *h<sup>+</sup> ura4-D18 ade6-M26 his3-D1*

SPH584 *h<sup>+</sup>/h<sup>-</sup> ade6-M26(+313 to +377)::fbp1(-870 to 806)/ade6-M26(+313 to +377)::fbp1(-870 to 806) leu1-32/+ his3-D1/+ ura4-D18/ura4-D18*

SPH585 *h<sup>+</sup>/h<sup>-</sup> ade6-M26/ade6-M26 leu1-32/+ his3-D1/+ ura4-D18/ura4-D18*

SPH586 *h<sup>+</sup> ura4-D18 ade6-M375*

SPH587 *h<sup>+</sup> ura4-D18 ade6-M375(+313 to +377)::fbp1(-870 to 806)*

SPH595 *h<sup>+</sup> ura4-D18 ade6-M26(+313 to +377)::fbp1(-870 to 806, (-851 to -842)::act1(+456 to +465)) his3-D1*

SPH597 *h<sup>+</sup> ura4-D18 ade6-M375 his3-D1*

SPH603 *h<sup>+</sup>/h<sup>-</sup> ade6-M26(+313 to +377)::fbp1(-870 to 806, (-851 to -842)::act1(+456 to +465))/ade6-M26(+313 to +377)::fbp1(-870 to 806, (-851 to -842)::act1(+456 to +465)) leu1-32/+ his3-D1/+ ura4-D18/ura4-D18*

SPH604 *h<sup>+</sup>/h<sup>-</sup> ade6-M375/ade6-M375 leu1-32/+ his3-D1/+ ura4-D18/ura4-D18*

SPH606 *h<sup>+</sup> ura4-D18 ade6-M375(+313 to +377)::fbp1(-870 to 806)*

SPH610 *h<sup>+</sup> ade6-M26 ura4-D18 pat1-114 rad50S*

SPH617 *h<sup>+</sup> ura4-D18 ade6-M375(+313 to +377)::fbp1(-870 to 806) his3-D1*

SPH621 *h<sup>+</sup> ura4-D18 ade6-4002(+313 to +377)::fbp1(-870 to 806) his3-D1*

SPH623 *h<sup>+</sup> ura4-D18 ade6-4099(+313 to +377)::fbp1(-870 to 806) his3-D1*

SPH628 *h<sup>+</sup>/h<sup>-</sup> ade6-M375(+313 to +377)::fbp1(-870 to 806)/ade6-M375(+313 to +377)::fbp1(-870 to 806) leu1-32/+ his3-D1/+ ura4-D18/ura4-D18*

SPH631 *h<sup>+</sup>/h<sup>-</sup> ade6-4002(+313 to +377)::fbp1(-870 to 806)/ade6-4002(+313 to +377)::fbp1(-870 to 806) leu1-32/+ his3-D1/+ ura4-D18/ura4-D18*

SPH632 *h<sup>+</sup>/h<sup>-</sup> ade6-4099(+313 to +377)::fbp1(-870 to 806)/ade6-4099(+313 to +377)::fbp1(-870 to 806) leu1-32/+ his3-D1/+ ura4-D18/ura4-D18*

SPH633 *h<sup>+</sup>/h<sup>-</sup> ade6-4095(+313 to +377)::fbp1(-870 to 806)/ade6-4095(+313 to +377)::fbp1(-870 to 806) leu1-32/+ his3-D1/+ ura4-D18/ura4-D18*

SPH634 *h<sup>+</sup>/h<sup>-</sup> ade6-4156(+313 to +377)::fbp1(-870 to 806)/ade6-4156(+313 to +377)::fbp1(-870 to 806) leu1-32/+ his3-D1/+ ura4-D18/ura4-D18*

SPH640 *h<sup>+</sup>/h<sup>-</sup> ade6-M26(+323 to +352)::fbp1(-860 to 831)/  
ade6-M26(+323 to +352)::fbp1(-860 to 831) leu1-32/+ his3-D1/+  
ura4-D18/ura4-D18*

SPH641 *h<sup>+</sup>/h<sup>-</sup> ade6-M26(+333 to +342)::fbp1(-850 to 841)/  
ade6-M26(+333 to +342)::fbp1(-850 to 841) leu1-32/+ his3-D1/+  
ura4-D18/ura4-D18*

SPH646 *h<sup>+</sup> ade6-M26 ura4-D18 SPBC24C6.09c promoter(-614 to  
-605)::act1(+465 to +456) pat1-114 rad50S*

SPH649 *h<sup>+</sup> ade6-M26(+313 to +377)::fbp1(-870 to 806) ura4-D18  
pat1-114 rad50S*

SPH658 *h<sup>+</sup>/h<sup>-</sup> ade6-4002/ade6-4002 leu1-32/+ his3-D1/+  
ura4-D18/ura4-D18*

SPH659 *h<sup>+</sup>/h<sup>-</sup> ade6-4099/ade6-4099 leu1-32/+ his3-D1/+  
ura4-D18/ura4-D18*

SPH660 *h<sup>+</sup>/h<sup>-</sup> ade6-4095/ade6-4095 leu1-32/+ his3-D1/+  
ura4-D18/ura4-D18*

SPH661 *h<sup>+</sup>/h<sup>-</sup> ade6-4156/ade6-4156 leu1-32/+ his3-D1/+  
ura4-D18/ura4-D18*

SPH673 *h<sup>+</sup> ade6-M26(+313 to +377)::fbp1(-870 to 806, (-851 to  
-842)::act1(+456 to +465)) ura4-D18 pat1-114 rad50S*

SPH703 *h<sup>+</sup> ura4-D18 ade6-4002(+313 to +377)::fbp1(-870 to 806, (-851  
to -842)::act1(+456 to +465)) his3-D1*

SPH706 *h<sup>+</sup> ura4-D18 ade6-M26(+313 to +377)::fbp1(-870 to 806, (-851 to  
-842)::act1(+456 to +465)) his3-D1*

SPH715 *h<sup>+</sup> ura4-D18 ade6-4099(+313 to +377)::fbp1(-870 to 806, (-851  
to -842)::act1(+456 to +465)) his3-D1*

SPH742 *h<sup>+</sup> ade6-4002 ura4-D18 pat1-114 rad50S*

SPH743 *h<sup>+</sup> ade6-4002(+313 to +377)::fbp1(-870 to 806) ura4-D18  
pat1-114 rad50S*



SPH744 *h<sup>+</sup> ade6-4002(+313 to +377)::fbp1(-870 to 806, (-851 to -842)::act1(+456 to +465)) ura4-D18 pat1-114 rad50S*

SPH745 *h<sup>+</sup> ade6-4099 ura4-D18 pat1-114 rad50S*

SPH746 *h<sup>+</sup> ade6-4099(+313 to +377)::fbp1(-870 to 806) ura4-D18 pat1-114 rad50S*

SPH747 *h<sup>+</sup> ade6-4099(+313 to +377)::fbp1(-870 to 806, (-851 to -842)::act1(+456 to +465)) ura4-D18 pat1-114 rad50S*

SPH811 *h<sup>+</sup> ade6-M26 ura4-D18 SPBC24C6.09c promoter(ATCTTACGTA)::(CCTTTACGTA) pat1-114 rad50S*

---

**Supplementary Table 2**

| No. | Name                  | Sequence (5'-3')                                                                                |
|-----|-----------------------|-------------------------------------------------------------------------------------------------|
| p1  | ade6-M26 cloning Fw   | AAAAACTAGTTGTCGAGTTCCTCTTGAAAC                                                                  |
| p2  | ade6-mlonc-1          | TTCATCACCGACCTCAATTGCATACCCACAGC<br>AATTACATAAGATCGACCCCAATTGCCTATGA<br>TTTTGTCTTGAATGCATCGCAGA |
| p3  | ade6-M26 cloning Rev  | AAAAGGGCCCGCAAGTATACGACAGGCTAA                                                                  |
| p4  | ade6-mlonc-2          | ATCATAGGCAATTGGGGTCGATCTTATGTAAT<br>TGCTGTGGGTATGCAATTGAGGTCGGTGATGA<br>ACCAGGAAAGTGTTGAAAAGCA  |
| p5  | UAS1, 2 mut cloning F | CATTGACTCCGATATCTCGC                                                                            |
| p6  | mlonc-mut 1A-T-R      | CATAAGAACGACCCCAATTGCCTATGA                                                                     |
| p7  | mlonc-mut 1A-C-R      | CATAAGAGCGACCCCAATTGCCTATGA                                                                     |
| p8  | mlonc-mut 1A-G-R      | CATAAGACCGACCCCAATTGCCTATGA                                                                     |
| p9  | mlonc-mut 2T-A-R      | ACATAAGTTCGACCCCAATTGCCTATG                                                                     |
| p10 | mlonc-mut 2T-C-R      | ACATAAGGTCGACCCCAATTGCCTATG                                                                     |
| p11 | mlonc-mut 2T-G-R      | ACATAAGCTCGACCCCAATTGCCTATG                                                                     |
| p12 | mlonc-mut 3C-A-R      | TACATAATATCGACCCCAATTGCCTATG                                                                    |
| p13 | mlonc-mut 3C-T-R      | TACATAAAATCGACCCCAATTGCCTATG                                                                    |
| p14 | mlonc-mut 3C-G-R      | TACATAACATCGACCCCAATTGCCTATG                                                                    |
| p15 | mlonc-mut 4T-A R      | TTACATATGATCGACCCCAATTGCCT                                                                      |
| p16 | mlonc-mut 4T-C R      | TTACATAGGATCGACCCCAATTGCCT                                                                      |
| p17 | mlonc-mut 4T-G R      | TTACATACGATCGACCCCAATTGCCT                                                                      |
| p18 | mlonc-mut 5T-A R      | ATTACATTAGATCGACCCCAATTGCCT                                                                     |
| p19 | mlonc-mut 5T-C R      | ATTACATGAGATCGACCCCAATTGCCT                                                                     |

|     |                       |                                |
|-----|-----------------------|--------------------------------|
| p20 | mlonc-mut 5T-G R      | ATTACATCAGATCGACCCCAATTGCCT    |
| p21 | mlonc-mut 6A-T-R      | AATTACAAAAGATCGACCCCAATTGCC    |
| p22 | mlonc-mut 6A-C-R      | AATTACAGAAGATCGACCCCAATTGCC    |
| p23 | mlonc-mut 6A-G-R      | CATACCCACAGCAATTACACAAGATCGACC |
| p24 | mlonc-mut 7T-A-R      | CAATTACTTAAGATCGACCCCAATTGC    |
| p25 | mlonc-mut 7T-C-R      | CAATTACGTAAGATCGACCCCAATTGC    |
| p26 | mlonc-mut 7T-G-R      | CAATTACCTAAGATCGACCCCAATTGC    |
| p27 | mlonc-mut 8G-A-R      | CATACCCACAGCAATTATATAAGATCGACC |
| p28 | mlonc-mut 8G-T-R      | GCAATTAAATAAGATCGACCCCAATTGC   |
| p29 | mlonc-mut 8G-C-R      | GCAATTAGATAAGATCGACCCCAATTGC   |
| p30 | mlonc-mut 9T-A-R      | AGCAATTCATAAGATCGACCCCAATTG    |
| p31 | mlonc-mut 9T-C-R      | AGCAATTGCATAAGATCGACCCCAATTG   |
| p32 | mlonc-mut 9T-G-R      | AGCAATTCATAAGATCGACCCCAATTG    |
| p33 | mlonc-mut 10A-T-R     | CAGCAATAACATAAGATCGACCCCAATTG  |
| p34 | mlonc-mut 10A-C-R     | CAGCAATGACATAAGATCGACCCCAATTG  |
| p35 | mlonc-mut 10A-G-R     | CAGCAATCACATAAGATCGACCCCAATTG  |
| p36 | UAS1, 2 mut cloning R | GCACCATACATAGTATAGCC           |
| p37 | mlonc-mut 1A-T-F      | GGGGTCGTTCTTATGTAATTGCTGTGGGTA |
| p38 | mlonc-mut 1A-C-F      | GGGGTCGCTCTTATGTAATTGCTGTGGGTA |
| p39 | mlonc-mut 1A-G-F      | GGGGTCGGTCTTATGTAATTGCTGTGGGTA |
| p40 | mlonc-mut 2T-A-F      | GGGTCGAACTTATGTAATTGCTGTGGGTA  |
| p41 | mlonc-mut 2T-C-F      | GGGTCGACCTTATGTAATTGCTGTGGGTA  |
| p42 | mlonc-mut 2T-G-F      | GGGTCGAGCTTATGTAATTGCTGTGGGTA  |
| p43 | mlonc-mut 3C-A-F      | GGTCGATATTATGTAATTGCTGTGGGTATG |

|     |                   |                                 |
|-----|-------------------|---------------------------------|
| p44 | mlonc-mut 3C-T-F  | GGTCGATTTTATGTAATTGCTGTGGGTATG  |
| p45 | mlonc-mut 3C-G-F  | GGTCGATGTTATGTAATTGCTGTGGGTATG  |
| p46 | mlonc-mut 4T-A-F  | GTCGATCATATGTAATTGCTGTGGGTATGC  |
| p47 | mlonc-mut 4T-C F  | GTCGATCCTATGTAATTGCTGTGGGTATGC  |
| p48 | mlonc-mut 4T-G F  | GTCGATCGTATGTAATTGCTGTGGGTATGC  |
| p49 | mlonc-mut 5T-A F  | TCGATCTAATGTAATTGCTGTGGGTATGC   |
| p50 | mlonc-mut 5T-C F  | TCGATCTCATGTAATTGCTGTGGGTATGC   |
| p51 | mlonc-mut 5T-G F  | TCGATCTGATGTAATTGCTGTGGGTATGC   |
| p52 | mlonc-mut 6A-T-F  | CGATCTTTTGTAAATTGCTGTGGGTATGC   |
| p53 | mlonc-mut 6A-C-F  | CGATCTTCTGTAATTGCTGTGGGTATGC    |
| p54 | mlonc-mut 6A-G-F  | GGTCGATCTTGTGTAATTGCTGTGGGTATG  |
| p55 | mlonc-mut 7T-A-F  | GATCTTAAGTAATTGCTGTGGGTATGCA    |
| p56 | mlonc-mut 7T-C-F  | GATCTTACGTAATTGCTGTGGGTATGCA    |
| p57 | mlonc-mut 7T-G-F  | GATCTTAGGTAATTGCTGTGGGTATGCA    |
| p58 | mlonc-mut 8G-A-F  | GGTCGATCTTATATAATTGCTGTGGGTATG  |
| p59 | mlonc-mut 8G-T-F  | ATCTTATTTAATTGCTGTGGGTATGCAATTG |
| p60 | mlonc-mut 8G-C-F  | ATCTTATCTAATTGCTGTGGGTATGCAATTG |
| p61 | mlonc-mut 9T-A-F  | TCTTATGAAATTGCTGTGGGTATGCAATTG  |
| p62 | mlonc-mut 9T-C-F  | TCTTATGCAATTGCTGTGGGTATGCAATTG  |
| p63 | mlonc-mut 9T-G-F  | TCTTATGGAATTGCTGTGGGTATGCAATTG  |
| p64 | mlonc-mut 10A-T-F | CTTATGTTATTGCTGTGGGTATGCAATTG   |
| p65 | mlonc-mut 10A-C-F | CTTATGTCATTGCTGTGGGTATGCAATTG   |
| p66 | mlonc-mut 10A-G-F | CTTATGTGATTGCTGTGGGTATGCAATTG   |
| p67 | SPNCRNA.1506-F    | GAGTAGCCATATTGAAGAGG            |

|     |                        |                                       |
|-----|------------------------|---------------------------------------|
| p68 | SPNCRNA.1506-mut-R     | AGAGTCCAAGCGGATACGTGGTTTAATGAAAA<br>C |
| p69 | SPNCRNA.1506-R         | GTTTAGGAAGCGAATTGTTGC                 |
| p70 | SPNCRNA.1506-mut-F     | CTTGGA CTCTAAAGGGTCGATTGCGTAAAG       |
| p71 | SPBC24C6.09c-3bp_mut-R | CGTAAAGGCGGATACGTGGTTTAATGAAAA        |
| p72 | SPBC24C6.09c-3bp_mut-F | ATCCGCCTTTACGTAAAAGGGTCGATTGC         |
| p73 | fbp1 ORF F             | CGCCGATAACAATCAGAAGC                  |
| p74 | fbp1 ORF R             | CGATGAGTTTGCAGCATCC                   |
| p75 | cam1 F                 | CTACCCGTAACCTTACAG                    |
| p76 | cam1 R                 | TGGAAGAAATGACACGAG                    |
| p77 | SPBC24c6.09c probe F   | CATCGTTTTCAACGTGCATG                  |
| P78 | SPBC24c6.09c probe R   | ATCTTCAAGGAAAAGAGCCG                  |
| P79 | SPNCRNA.1506 probe F   | CTCTACTTCCAACAATGCAAC                 |
| P80 | SPNCRNA.1506 probe R   | GACGTTTTTCATTTGCTATCC                 |
| p81 | SPBC24C6.09c mlonbox-F | CTAGTTTCAACACTTCACAAACA               |
| p82 | SPBC24C6.09c mlonbox-R | CTCTCTTTCTTTGACTCATAAA                |
| p83 | prp3 F                 | GCACAGTCGTTGTACAAATTCGTATTCCC         |
| p84 | prp3 R                 | ACGATTCTAAACGCCTCTTGTTACGATCC         |
| p85 | ade6-DSB probe2-F      | CCATTTGTGGGAACCAATATG                 |
| p86 | ade6-DSB probe2-R      | GCTCGTTTAAATGCTAAACC                  |
| p87 | SPBC24C6.09c-DSB-F     | GGTTTCCCCATCCTAATATG                  |
| P88 | SPBC24C6.09c-DSB-R     | GATCCACGCTCTCGAATG                    |
| P89 | ade6-GSP               | CATAAAGATGCAAAGTTGCACCGGG             |
| p90 | M13-F                  | GTAAAACGACGGCCAGT                     |

---
