# Supplementary material for: lncRNA transcription induces meiotic recombination through chromatin remodelling in fission yeast
Source: PubMed Central journal article supplement (PMC7935937; doi:10.1038/s42003-021-01798-8), 2021-03-05
Supplement: 42003_2021_1798_MOESM4_ESM.pdf [file 42003_2021_1798_MOESM4_ESM.pdf]

## **Description of Additional Supplementary Files**

**File name:** Supplementary Data 1

**Description:** Source data behind all graphs.
